# Supplementary material for: Theoretical study of D–A′–π–A/D–π–A′–π–A triphenylamine and quinoline derivatives as sensitizers for dye-sensitized solar cells
Source: Royal Society of Chemistry journal article supplement (doi:10.1039/d0ra01040e), 2020-01-01
Supplement: d0ra01040e1.pdf [file d0ra01040e1.pdf]

**Supporting information for:**  
**Theoretical study of D-A'- $\pi$ -A / D- $\pi$ -A'- $\pi$ -A triphenylamine and quinoline  
derivatives as sensitizer for dye-sensitized solar cells**

Ying Zhang,<sup>‡a</sup> Ji Cheng,<sup>‡a</sup> Wang Deng,<sup>‡b</sup> Bin Sun,<sup>c</sup> Zhixin Liu,<sup>a</sup> Lei Yan,<sup>\*a</sup> Xueye  
Wang,<sup>\*a</sup> Baoming Xu,<sup>\*b</sup> Xingzhu Wang<sup>\*a,b</sup>

<sup>a</sup> *College of Chemistry, School of Physics and Optoelectronics, Xiangtan University, Xiangtan, Hunan  
Province 411105, China*

<sup>b</sup> *Department of Materials Science & Engineering and Academy for Advanced Interdisciplinary  
Research, Southern University of Science and Technology, Shenzhen, Guangdong Province 518055,  
China,*

<sup>c</sup> *North China Sea Marine Forecasting Center of Ministry of Natural Resources, Qingdao, Shandong  
Province 266000, China*

*\*Corresponding authors.*

*E-mail addresses: xz\_wang@hotmail.com (X.Z. Wang); yanlei@xtu.edu.cn (L.  
Yan); wxueye@xtu.edu.cn (X. Wang); xubm@sustech.edu.cn (B. Xu)*

*‡ Those authors contributed equally.*

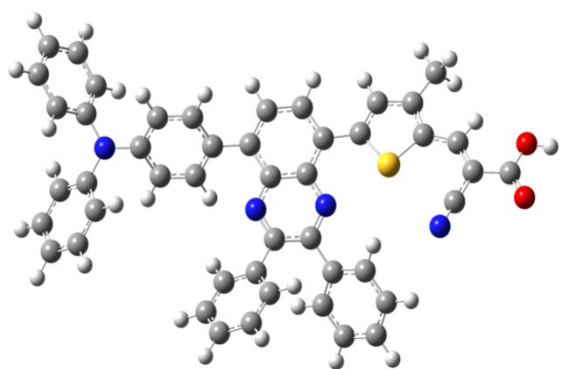

D1

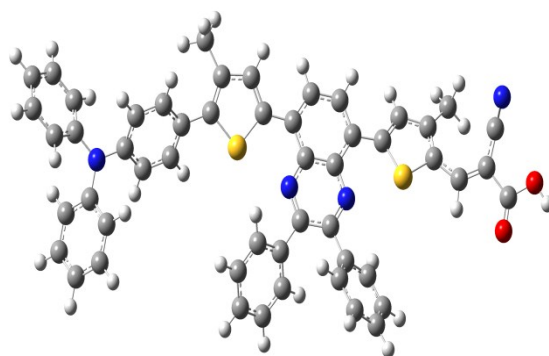

D2

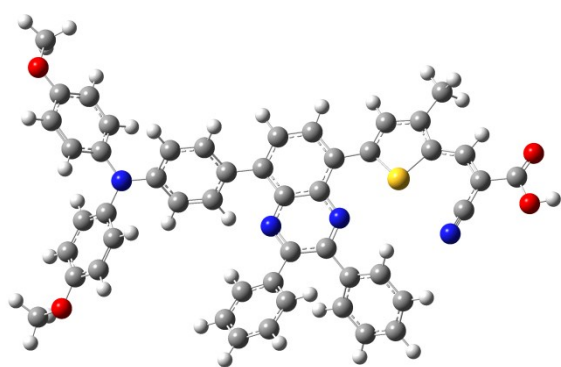

D3

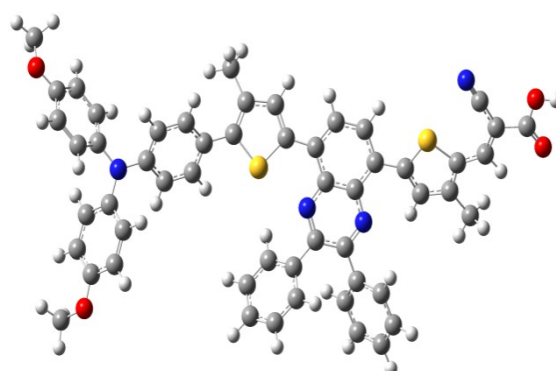

D4

Figure S1. The optimized structures of dyes D1-D4 by DFT//B3LYP/6-311G(d,p)
